# Supplementary material for: Environmental sequencing of marine protistan plankton communities reveals the effects of mesoscale cyclonic eddy transport on regional protistan diversity in subtropical offshore waters
Source: Copernicus journal article supplement (doi:10.5194/egusphere-2023-682), 2023-04-20
Supplement: Supplementary file 1 [file egusphere-2023-682-supplement.zip]

Supplementary File 3. Sequence data overview from raw sequence files to high-quality sequences used in downstream analyses for all sampling stations of the three eddies (CE\_2019\_19N\_18W, CE\_2019\_18N\_20W CE\_2019\_14N\_25W) under study and the two reference stations (CVOO, Cape Blanc).

| Sample                     | input   | filtered | Denoised & replicated F | Denoised & replicated R | merged  | ASVs postCC | Reads postCC | target ASVs | target reads |
|----------------------------|---------|----------|-------------------------|-------------------------|---------|-------------|--------------|-------------|--------------|
| Reference_CB_DCM           | 475787  | 470976   | 466333                  | 468312                  | 456607  | 2902        | 456537       | 2776        | 353429       |
| Reference_CB_Sub-DCM       | 213818  | 212602   | 210374                  | 210602                  | 204126  | 2206        | 204126       | 2024        | 151117       |
| Reference_CB_OMZ           | 344048  | 342806   | 339644                  | 339800                  | 331043  | 2642        | 331040       | 2241        | 289156       |
| Reference_CVOO_DCM         | 431624  | 427931   | 422936                  | 424494                  | 408719  | 2869        | 408278       | 2663        | 313270       |
| Reference_CVOO_Sub-DCM     | 576285  | 571304   | 563376                  | 566185                  | 547876  | 3902        | 547717       | 3390        | 427502       |
| Reference_CVOO_OMZ         | 472313  | 466262   | 459571                  | 461981                  | 444955  | 3322        | 444814       | 2979        | 375265       |
| CE_2019_14N_25W(1)_DCM     | 834786  | 831510   | 828185                  | 826625                  | 811576  | 2385        | 811020       | 2077        | 608278       |
| CE_2019_14N_25W(1)_Sub-DCM | 1661594 | 1656719  | 1648853                 | 1646930                 | 1621859 | 6837        | 1621394      | 5612        | 1261983      |
| CE_2019_14N_25W(1)_OMZ     | 1237803 | 1234433  | 1229628                 | 1227291                 | 1212281 | 5208        | 1211696      | 4582        | 831732       |
| CE_2019_14N_25W(2)_DCM     | 445733  | 441582   | 437651                  | 439261                  | 430041  | 1846        | 429931       | 1657        | 353477       |
| CE_2019_14N_25W(2)_Sub-DCM | 613266  | 607907   | 600322                  | 604049                  | 583035  | 3443        | 582987       | 3030        | 465946       |
| CE_2019_14N_25W(2)_OMZ     | 650835  | 645455   | 637722                  | 640191                  | 621200  | 4347        | 621055       | 3988        | 532435       |
| CE_2019_14N_25W(3)_Sub-DCM | 469061  | 465516   | 460487                  | 462346                  | 450693  | 2791        | 450629       | 2636        | 333803       |
| CE_2019_14N_25W(3)_DCM     | 733129  | 726492   | 720504                  | 722933                  | 711737  | 1918        | 710829       | 1482        | 525226       |
| CE_2019_14N_25W(3)_OMZ     | 630749  | 625437   | 617288                  | 620394                  | 600984  | 4257        | 600918       | 3963        | 487370       |
| CE_2019_18N_20W(1)_DCM     | 372102  | 367511   | 363631                  | 365289                  | 356048  | 1959        | 356045       | 1896        | 279385       |
| CE_2019_18N_20W(1)_Sub-DCM | 510256  | 506621   | 502708                  | 503965                  | 493509  | 1943        | 493507       | 1782        | 411001       |
| CE_2019_18N_20W(1)_OMZ     | 507680  | 503883   | 501076                  | 502095                  | 495656  | 1907        | 495617       | 1875        | 439518       |
| CE_2019_18N_20W(2)_DCM     | 397224  | 393562   | 390844                  | 391622                  | 383490  | 1348        | 383003       | 1256        | 251667       |
| CE_2019_18N_20W(2)_Sub-DCM | 537267  | 534180   | 529620                  | 531745                  | 517864  | 2181        | 517785       | 1833        | 441060       |
| CE_2019_18N_20W(2)_OMZ     | 615186  | 610640   | 605233                  | 606707                  | 590395  | 3040        | 590333       | 2782        | 498435       |
| CE_2019_18N_20W(3)_DCM     | 528186  | 521919   | 517826                  | 519624                  | 508093  | 1929        | 508042       | 1886        | 374481       |
| CE_2019_18N_20W(3)_Sub-DCM | 465780  | 462688   | 457076                  | 460029                  | 448571  | 2191        | 448447       | 1990        | 380788       |
| CE_2019_18N_20W(3)_OMZ     | 529856  | 526198   | 522490                  | 523397                  | 513969  | 1935        | 513894       | 1666        | 425208       |
| CE_2019_18N_20W(4)_DCM     | 313079  | 309563   | 307087                  | 307823                  | 301376  | 1382        | 301260       | 1324        | 214045       |
| CE_2019_18N_20W(4)_Sub-DCM | 522929  | 519771   | 515496                  | 517490                  | 506094  | 2165        | 506049       | 1743        | 418786       |
| CE_2019_18N_20W(4)_OMZ     | 513248  | 510053   | 502586                  | 508240                  | 495312  | 1304        | 495312       | 1136        | 439952       |
| CE_2019_19N_18W_DCM        | 576406  | 572271   | 569431                  | 570103                  | 562554  | 1359        | 562216       | 1264        | 456548       |
| CE_2019_19N_18W_Sub-DCM    | 176515  | 175039   | 173344                  | 173610                  | 169331  | 1682        | 169329       | 1498        | 131108       |
| CE_2019_19N_18W_OMZ        | 310076  | 303304   | 300728                  | 301071                  | 287267  | 2436        | 287237       | 2356        | 237637       |
