# Supplementary material for: Environmental sequencing of marine protistan plankton communities reveals the effects of mesoscale cyclonic eddy transport on regional protistan diversity in subtropical offshore waters
Source: Copernicus journal article supplement (doi:10.5194/egusphere-2023-682), 2023-04-20

**Supplementary File 4.** Rarefaction profiles for all sampling stations of the three eddies (CE\_2019\_19N\_18W, CE\_2019\_18N\_20W CE\_2019\_14N\_25W) under study and the two reference stations (CVOO, Cape Blanc) for DCM (a), sub-DCM (b) and OMZ (c). Profiles show (near-)sample saturation for all samples.

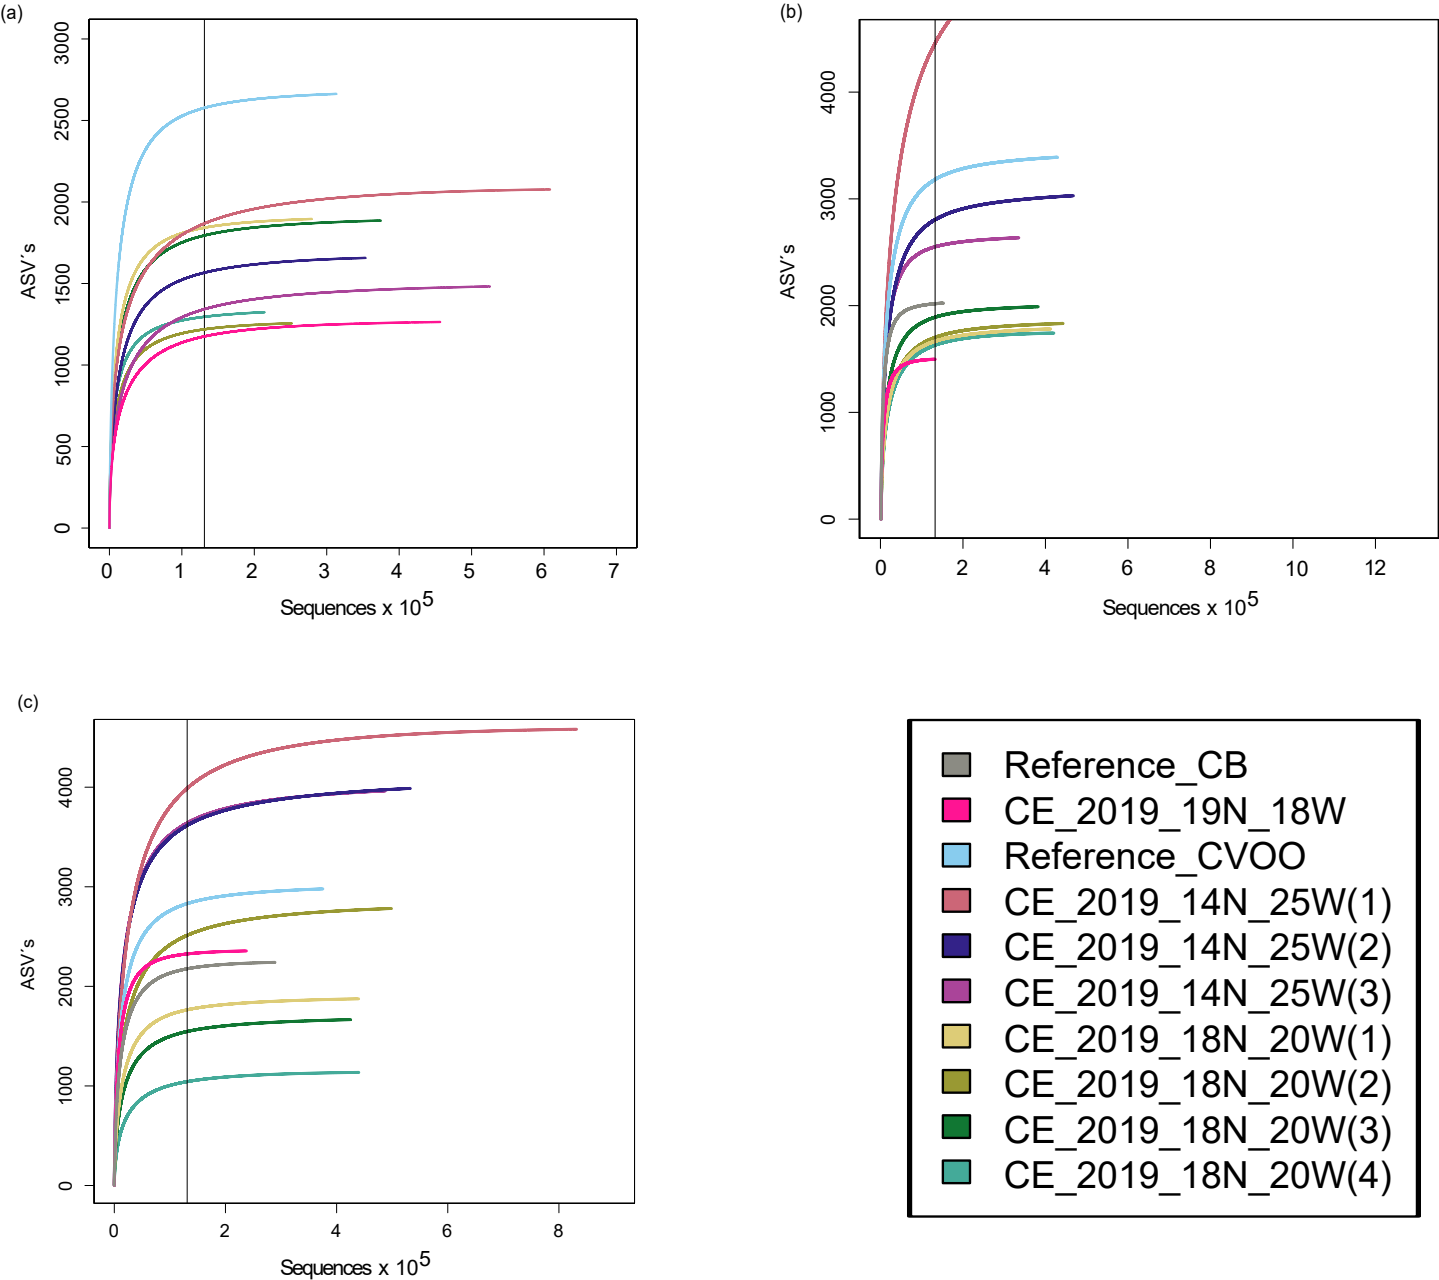

Supplement: Supplementary file 2 [file egusphere-2023-682-supplement.zip]
