# Supplementary material for: Environmental sequencing of marine protistan plankton communities reveals the effects of mesoscale cyclonic eddy transport on regional protistan diversity in subtropical offshore waters
Source: Copernicus journal article supplement (doi:10.5194/egusphere-2023-682), 2023-04-20
Supplement: Supplementary file 3 [file egusphere-2023-682-supplement.zip]

Supplementary File 2. Physicochemical and nutrient data for each sampling station with the respective depth layer (u.d. = under detection limit).

| Sample                     | Depth [m] | Nitrate [μmol/l] | Phosphate [μmol/l] | OA [μmol/l] | Pressure [dbar] | Temperature [°C] | Salinity [PSS-78] | DO [μmol/kg] | Density [kg/m³] | Fluorescence [μg/L] | Turbidity [NTU] |
|----------------------------|-----------|------------------|--------------------|-------------|-----------------|------------------|-------------------|--------------|-----------------|---------------------|-----------------|
| Reference_CB_DCM           | 95        | 0.28             | 0.16               | 0.28        | 91              | 20.37            | 36.8              | 209.5        | 26.04           | 0.97                | 0.09            |
| Reference_CB_Sub-DCM       | 170       | 11.2             | 0.73               | 2.67        | 166             | 18.04            | 36.5              | 171.49       | 26.42           | 0.04                | 0.08            |
| Reference_CB_OMZ           | 460       | 26.79            | 1.6                | 9.62        | 463             | 11.54            | 35.45             | 72.48        | 27.04           | 0.05                | 0.08            |
| CE_2019_19N_18W_DCM        | 20        | 11.05            | 0.85               | 2.32        | 27              | 17.83            | 35.85             | 50.06        | 25.96           | 1.05                | 0.21            |
| CE_2019_19N_18W_Sub-DCM    | 60        | 28.61            | 1.79               | 7.74        | 65              | 14.8             | 35.62             | 30.02        | 26.5            | 0.05                | 0.08            |
| CE_2019_19N_18W_OMZ        | 244       | 30.16            | 1.89               | 10.82       | 246             | 12.59            | 35.45             | 42.83        | 26.83           | 0.05                | 0.09            |
| Reference_CVOO_DCM         | 69.8      | 9.93             | 0.7                | 2.7         | 70.3            | 19.66            | 36.42             | 156.01       | 25.65           | 0.57                | 0.09            |
| Reference_CVOO_Sub-DCM     | 139.1     | 23.52            | 1.41               | 7.06        | 140             | 14.8             | 35.79             | 78.68        | 26.6            | 0.05                | 0.07            |
| Reference_CVOO_OMZ         | 359.7     | 32.08            | 1.93               | 12.86       | 362.2           | 11.05            | 35.31             | 58.72        | 27.02           | 0.05                | 0.08            |
| CE_2019_14N_25W(1)_DCM     | 35.1      | 3.43             | 0.32               | 1.8         | 35.3            | 21.95            | 36.43             | 204.93       | 25.18           | 1.1                 | 0.11            |
| CE_2019_14N_25W(1)_Sub-DCM | 108.4     | 20.63            | 1.23               | 5.73        | 109.1           | 16.1             | 36.02             | 92.97        | 26.55           | 0.08                | 0.07            |
| CE_2019_14N_25W(1)_OMZ     | 332.7     | 31.18            | 1.84               | 12.28       | 335             | 11.27            | 35.34             | 60.41        | 27.01           | 0.05                | 0.08            |
| CE_2019_14N_25W(2)_DCM     | 48.2      | u.d.             | 0.34               | 1.86        | 48.5            | 21.75            | 36.32             | 128.63       | 26.08           | 1.03                | 0.1             |
| CE_2019_14N_25W(2)_Sub-DCM | 98.7      | 17.23            | 1.34               | 6.64        | 99.3            | 15.78            | 35.86             | 80.51        | 26.54           | 0.11                | 0.08            |
| CE_2019_14N_25W(2)_OMZ     | 375.9     | 33.43            | 1.95               | 13.34       | 378.4           | 10.86            | 35.28             | 57.44        | 27.02           | 0.05                | 0.08            |
| CE_2019_14N_25W(3)_Sub-DCM | 100.6     | 23.61            | 1.42               | 7.12        | 101.2           | 15.28            | 35.8              | 78.22        | 26.55           | 0.12                | 0.07            |
| CE_2019_14N_25W(3)_DCM     | 20.4      | 4.4              | 0.41               | 1.85        | 20.5            | 21.64            | 36.45             | 170.62       | 25.69           | 1.81                | 0.14            |
| CE_2019_14N_25W(3)_OMZ     | 351.2     | 32.01            | 1.91               | 12.98       | 353.5           | 11.06            | 35.32             | 58.26        | 27.02           | 0.05                | 0.07            |
| CE_2019_18N_20W(1)_DCM     | 30.6      | 1.05             | 0.21               | 0.41        | 30.8            | 22.5             | 36.42             | 215.03       | 25.16           | 1.14                | 0.13            |
| CE_2019_18N_20W(1)_Sub-DCM | 119.7     | 24.99            | 1.54               | 7.74        | 120.5           | 14.8             | 35.8              | 68.06        | 26.64           | 0.05                | 0.07            |
| CE_2019_18N_20W(1)_OMZ     | 385.2     | 32.88            | 2                  | 13.13       | 387.9           | 11.2             | 35.35             | 53.19        | 27.02           | 0.05                | 0.07            |
| CE_2019_18N_20W(2)_DCM     | 18.7      | 0.88             | 0.2                | 0.68        | 18.8            | 22.67            | 36.44             | 217.2        | 25.11           | 1.42                | 0.12            |
| CE_2019_18N_20W(2)_Sub-DCM | 119.7     | 27.12            | 1.66               | 9.07        | 120.4           | 13.64            | 35.52             | 65.23        | 26.6            | 0.07                | 0.08            |
| CE_2019_18N_20W(2)_OMZ     | 399.2     | 34.06            | 2.04               | 14.19       | 402             | 10.68            | 35.26             | 48.56        | 27.02           | 0.06                | 0.07            |
| CE_2019_18N_20W(3)_DCM     | 9.7       | 1.65             | 0.24               | 0.62        | 9.8             | 22.44            | 36.39             | 219.73       | 25.15           | 1.31                | 0.13            |
| CE_2019_18N_20W(3)_Sub-DCM | 119.3     | 24.78            | 1.54               | 7.57        | 120.1           | 14.96            | 35.78             | 64.15        | 26.58           | 0.06                | 0.07            |
| CE_2019_18N_20W(3)_OMZ     | 380.1     | 32.6             | 1.98               | 13.56       | 382.7           | 11.02            | 35.34             | 46.33        | 27              | 0.05                | 0.07            |
| CE_2019_18N_20W(4)_DCM     | 21.8      | 1.93             | 0.25               | 0.51        | 22              | 22.46            | 36.4              | 218.71       | 25.14           | 1.43                | 0.13            |
| CE_2019_18N_20W(4)_Sub-DCM | 98.4      | 24.1             | 1.43               | 6.98        | 99              | 15.13            | 35.89             | 77.38        | 26.58           | 0.08                | 0.08            |
| CE_2019_18N_20W(4)_OMZ     | 348.1     | 31.21            | 1.85               | 11.95       | 350.5           | 11.74            | 35.43             | 53.38        | 26.98           | 0.05                | 0.08            |
