# Supplementary material for: Environmental sequencing of marine protistan plankton communities reveals the effects of mesoscale cyclonic eddy transport on regional protistan diversity in subtropical offshore waters
Source: Copernicus journal article supplement (doi:10.5194/egusphere-2023-682), 2023-04-20

Supplementary File 5. Proportions of all phyla (a), haptophyte (b), radiolarian (c), Discoba (d) and dinoflagellate (e) taxa estimated by relative sequence read proportions in the DCM, sub-DCM and OMZ of each individual sample of the three eddies under study (CE\_2019\_19N\_18W, CE\_2019\_18N\_20W, CE\_2019\_14N\_25W) and the two background waters (CVOO and CB).

a)

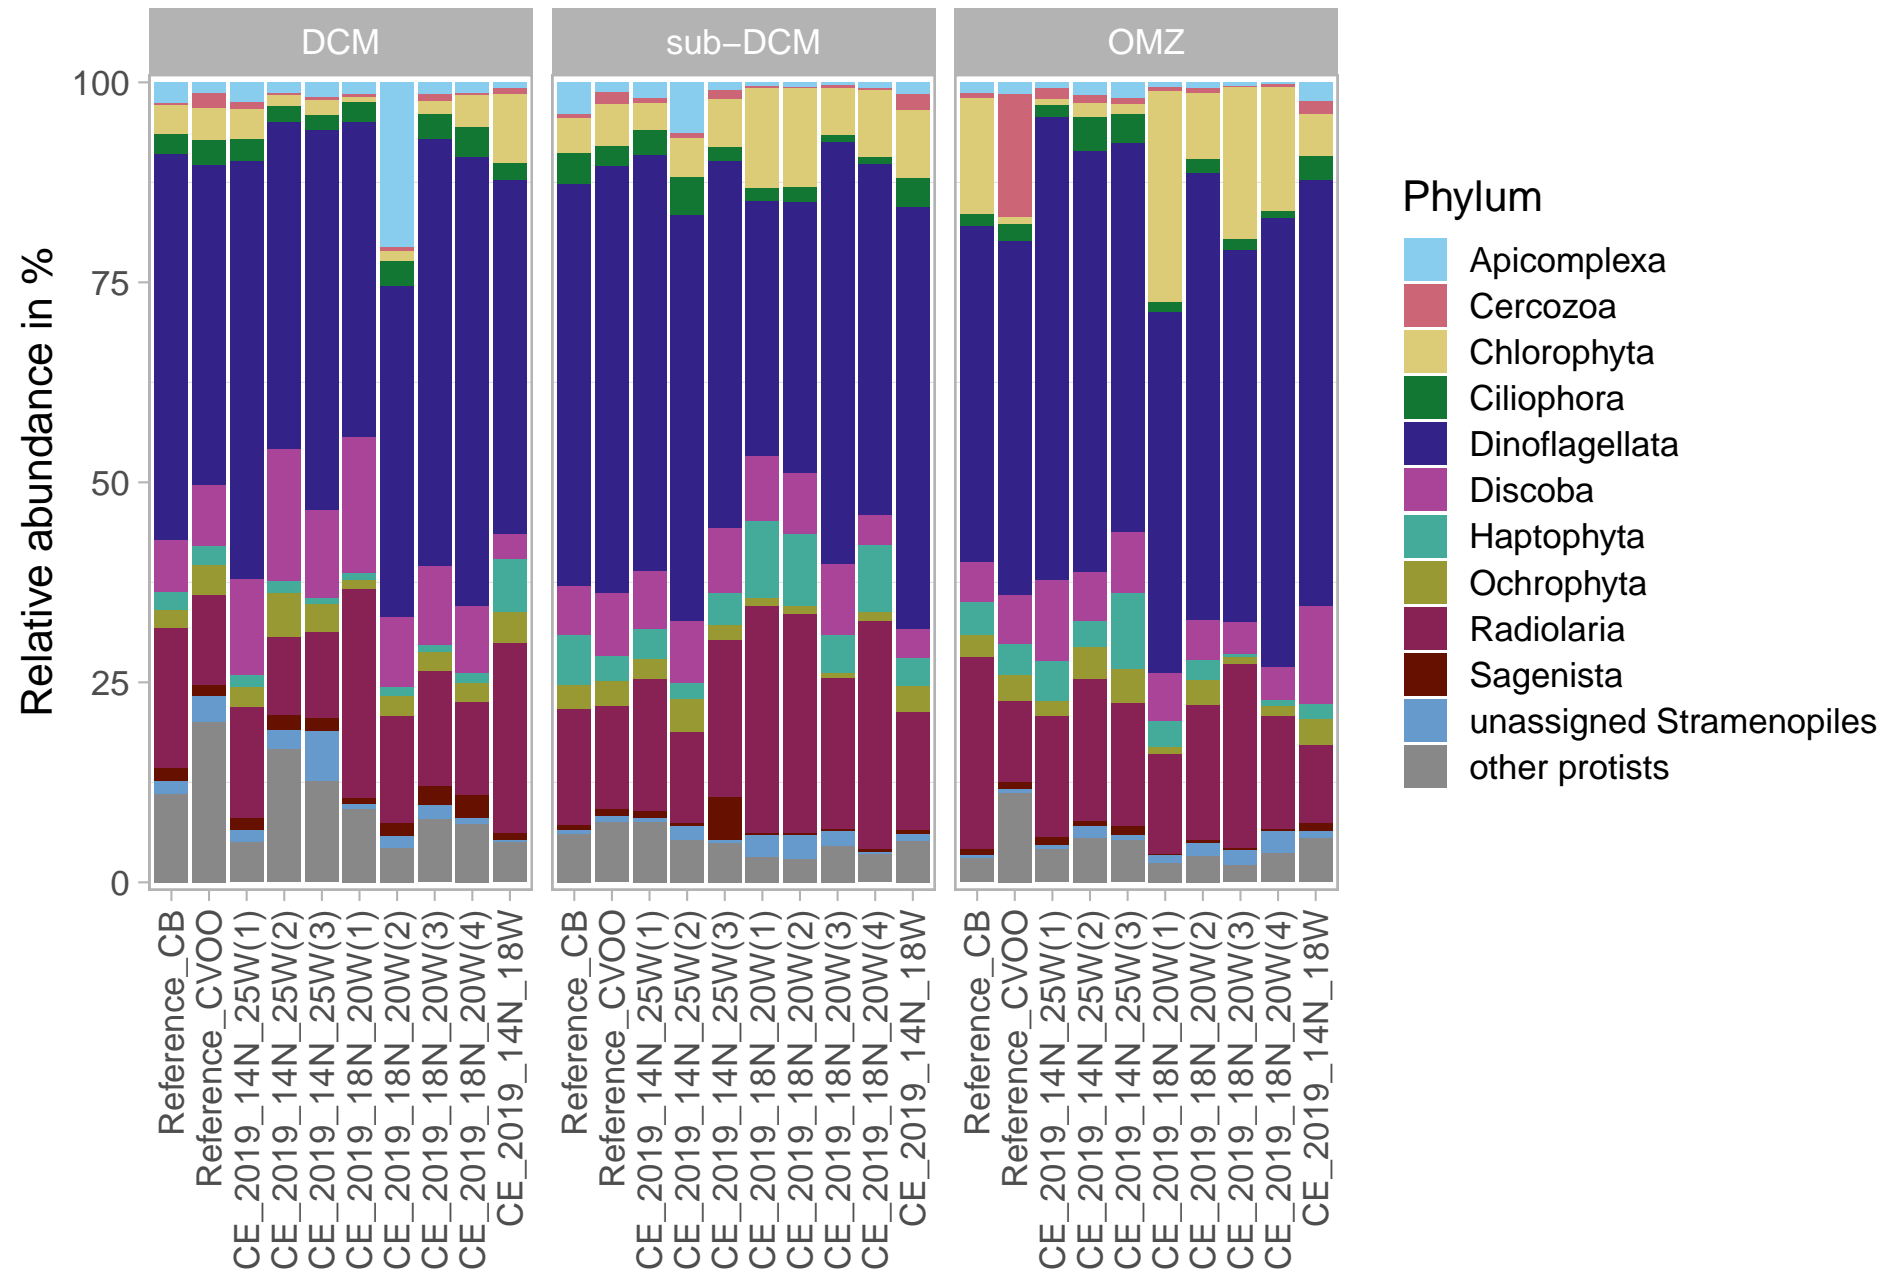

b)

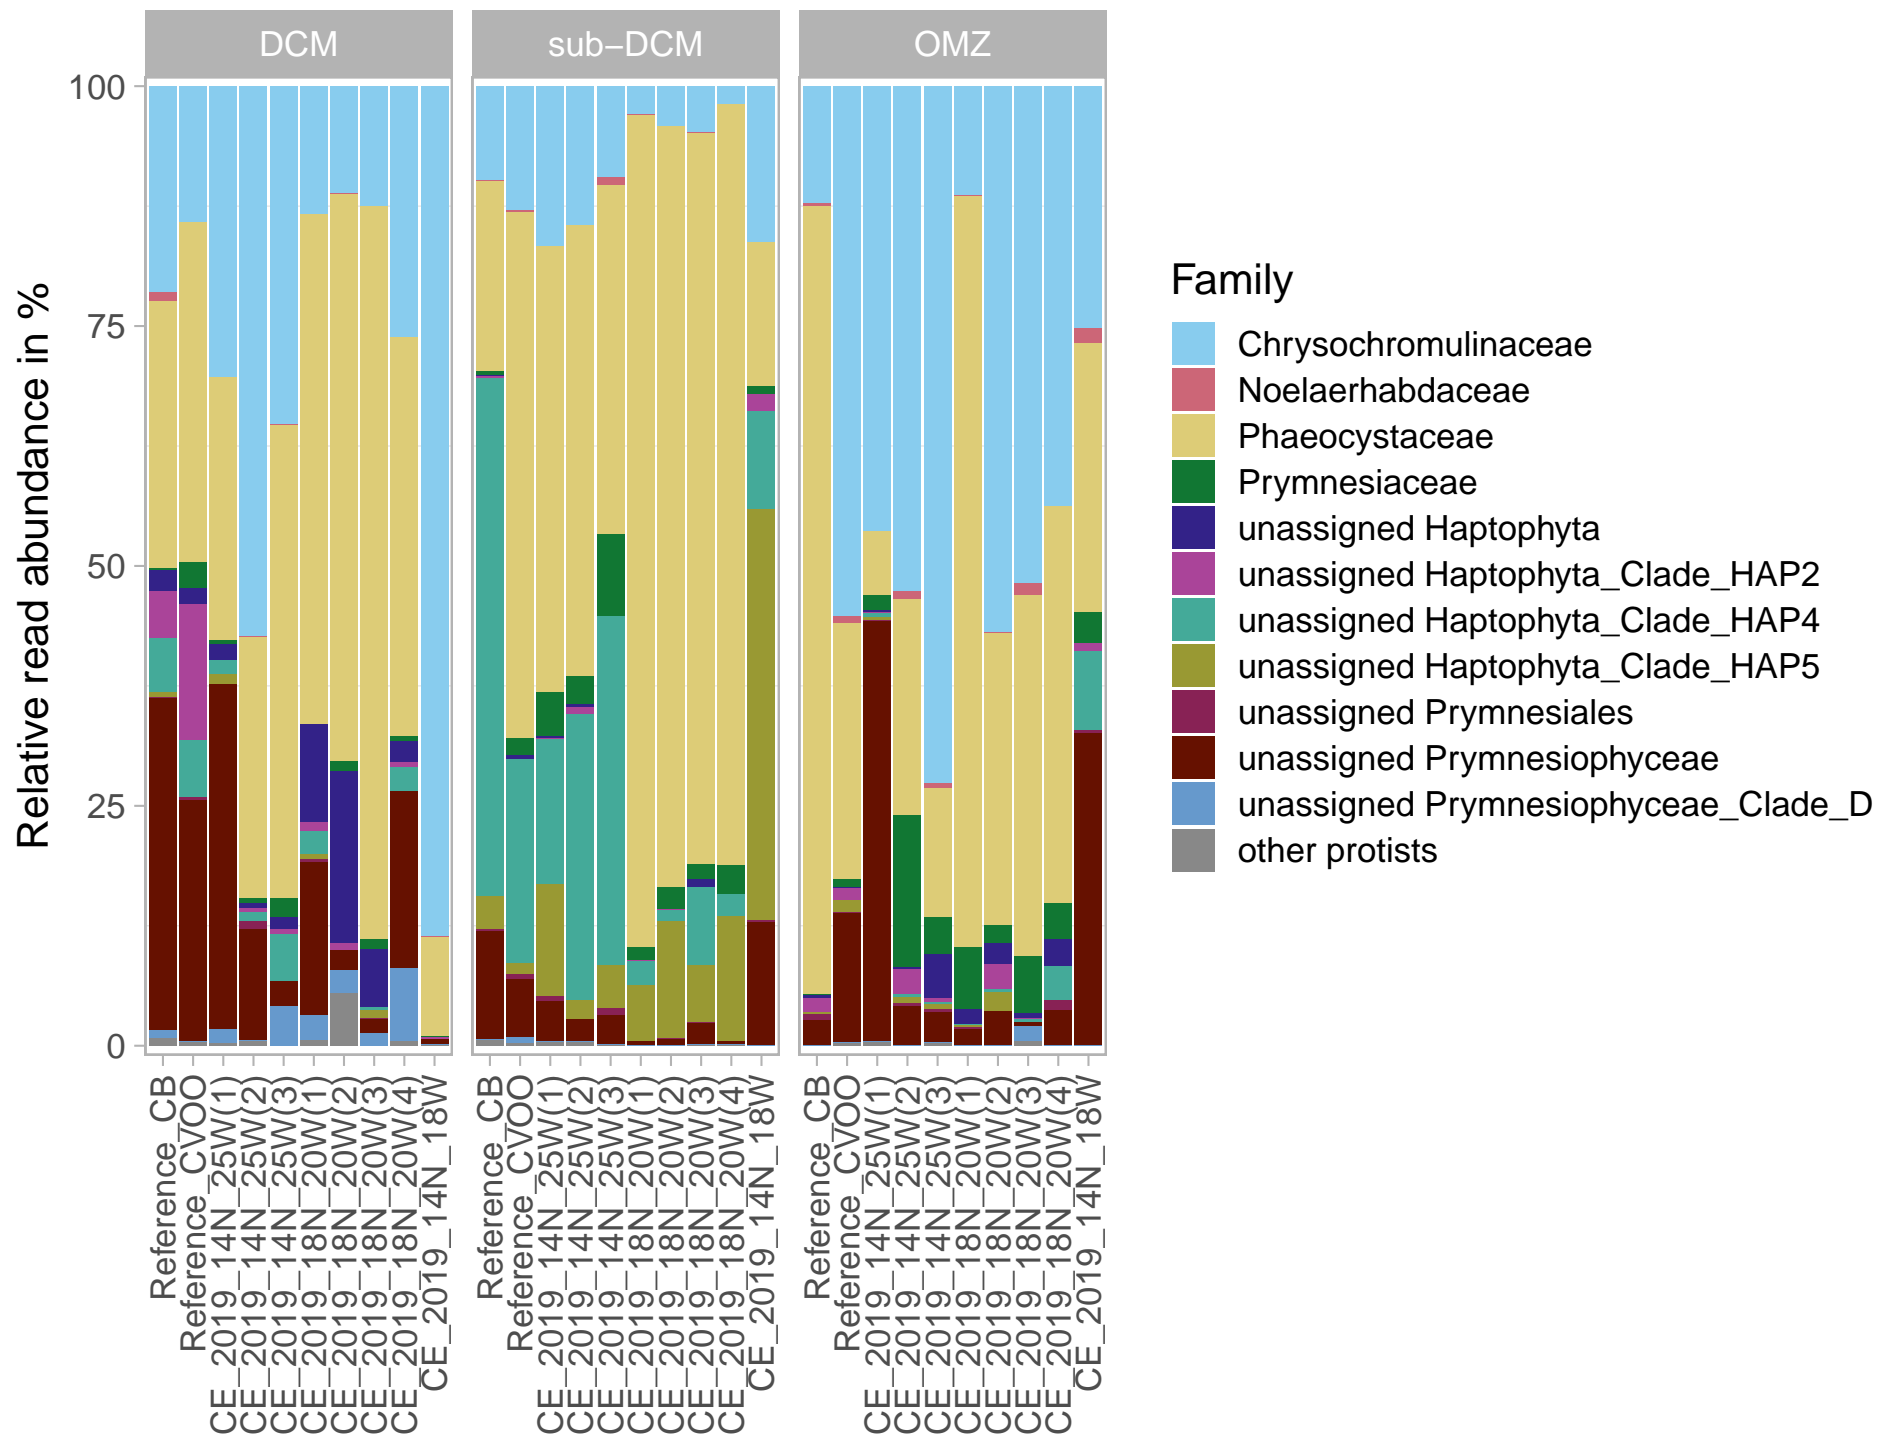

c)

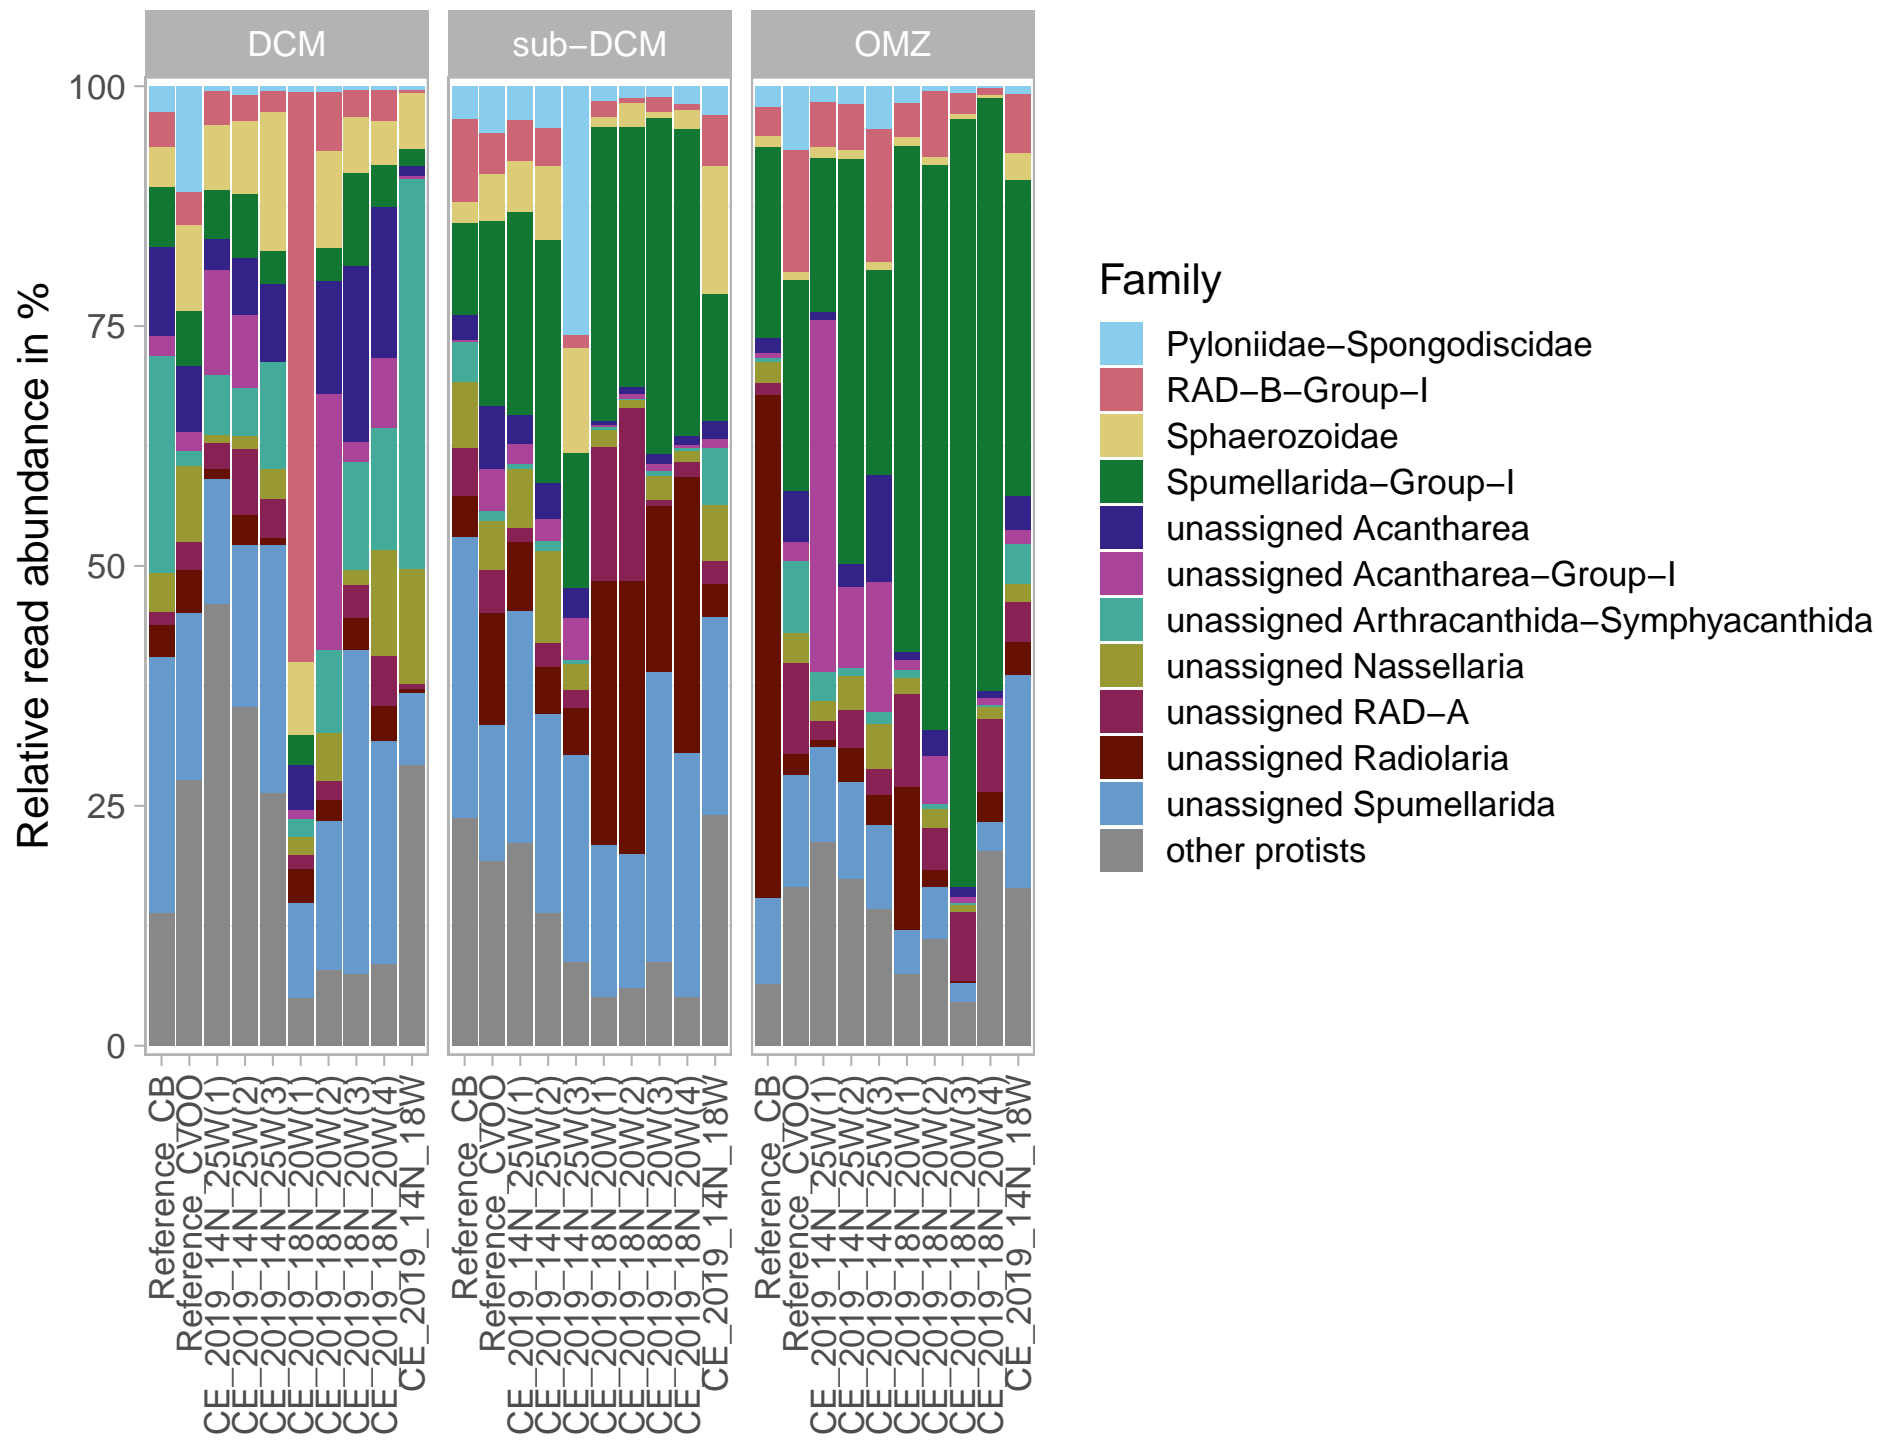

d)

Relative read abundance in %

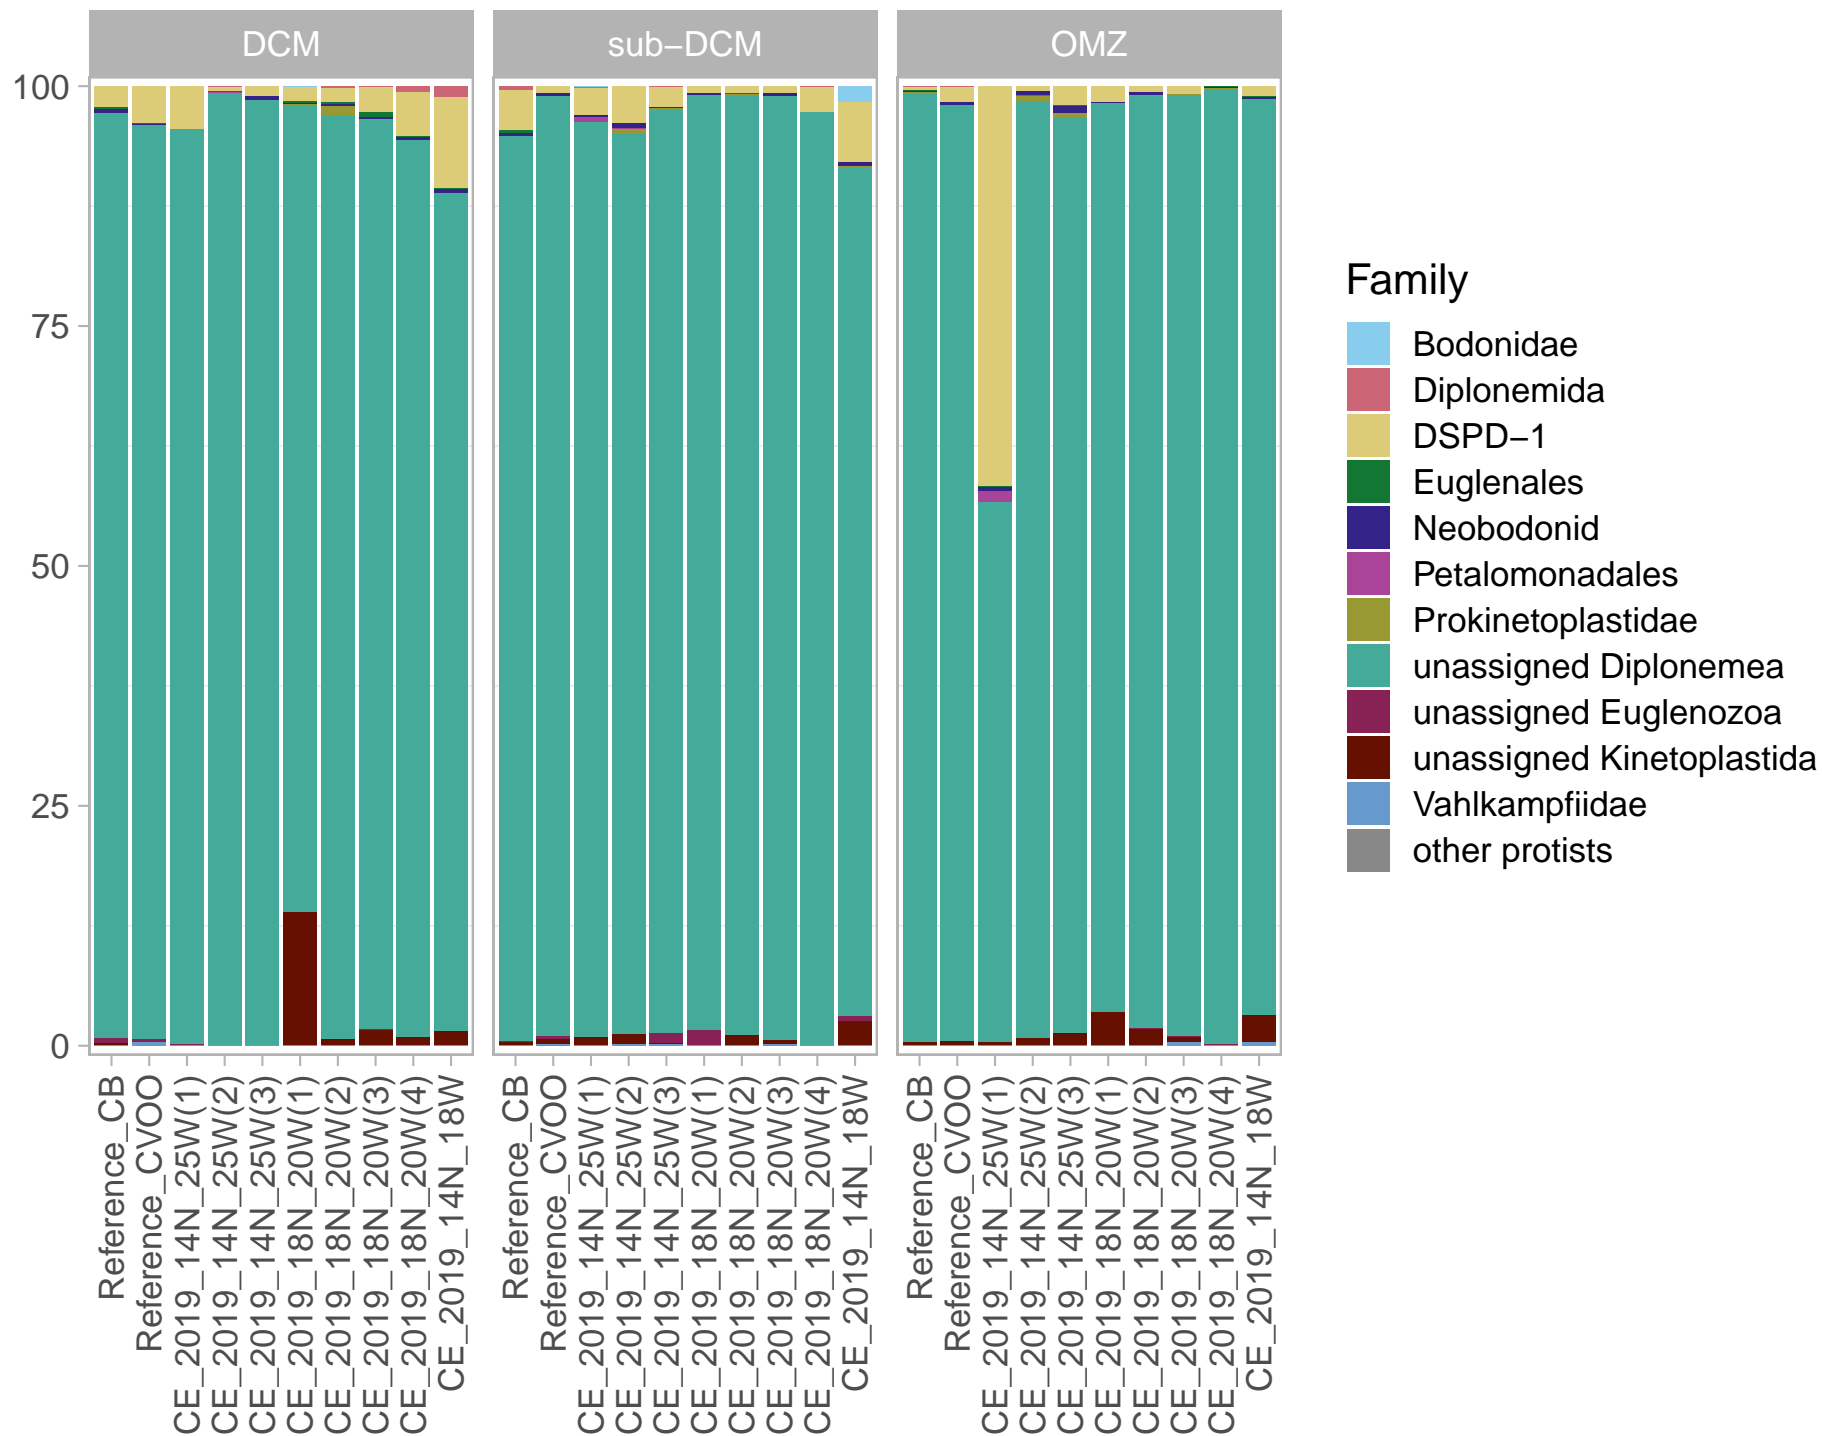

e)

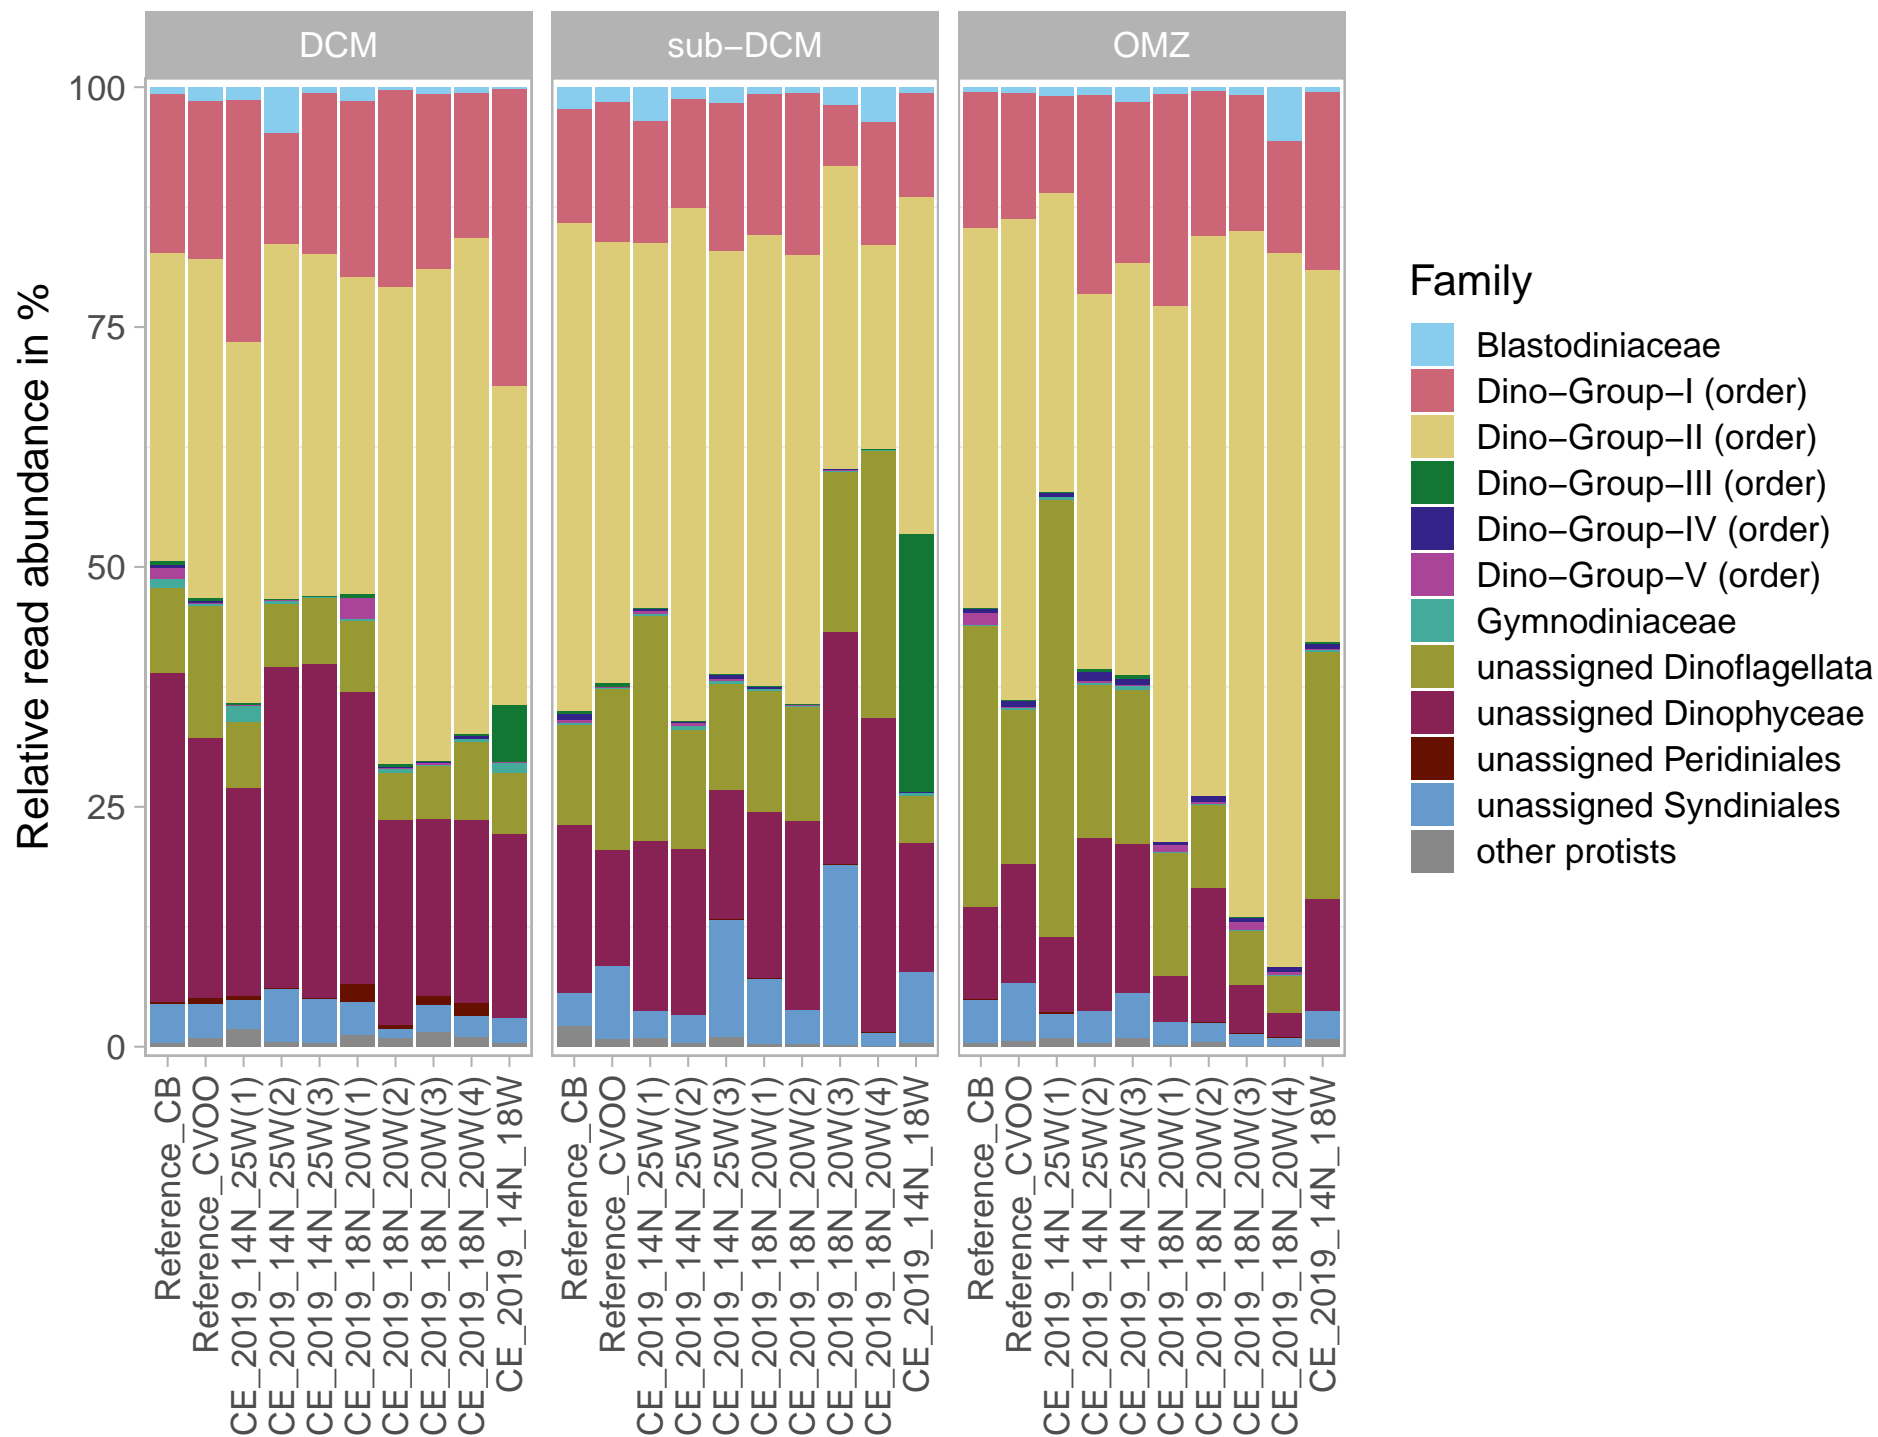

Supplement: Supplementary file 5 [file egusphere-2023-682-supplement.zip]
