# Supplementary figures and images for: Environmental sequencing of marine protistan plankton communities reveals the effects of mesoscale cyclonic eddy transport on regional protistan diversity in subtropical offshore waters
Source: Copernicus journal article supplement (doi:10.5194/egusphere-2023-682), 2023-04-20

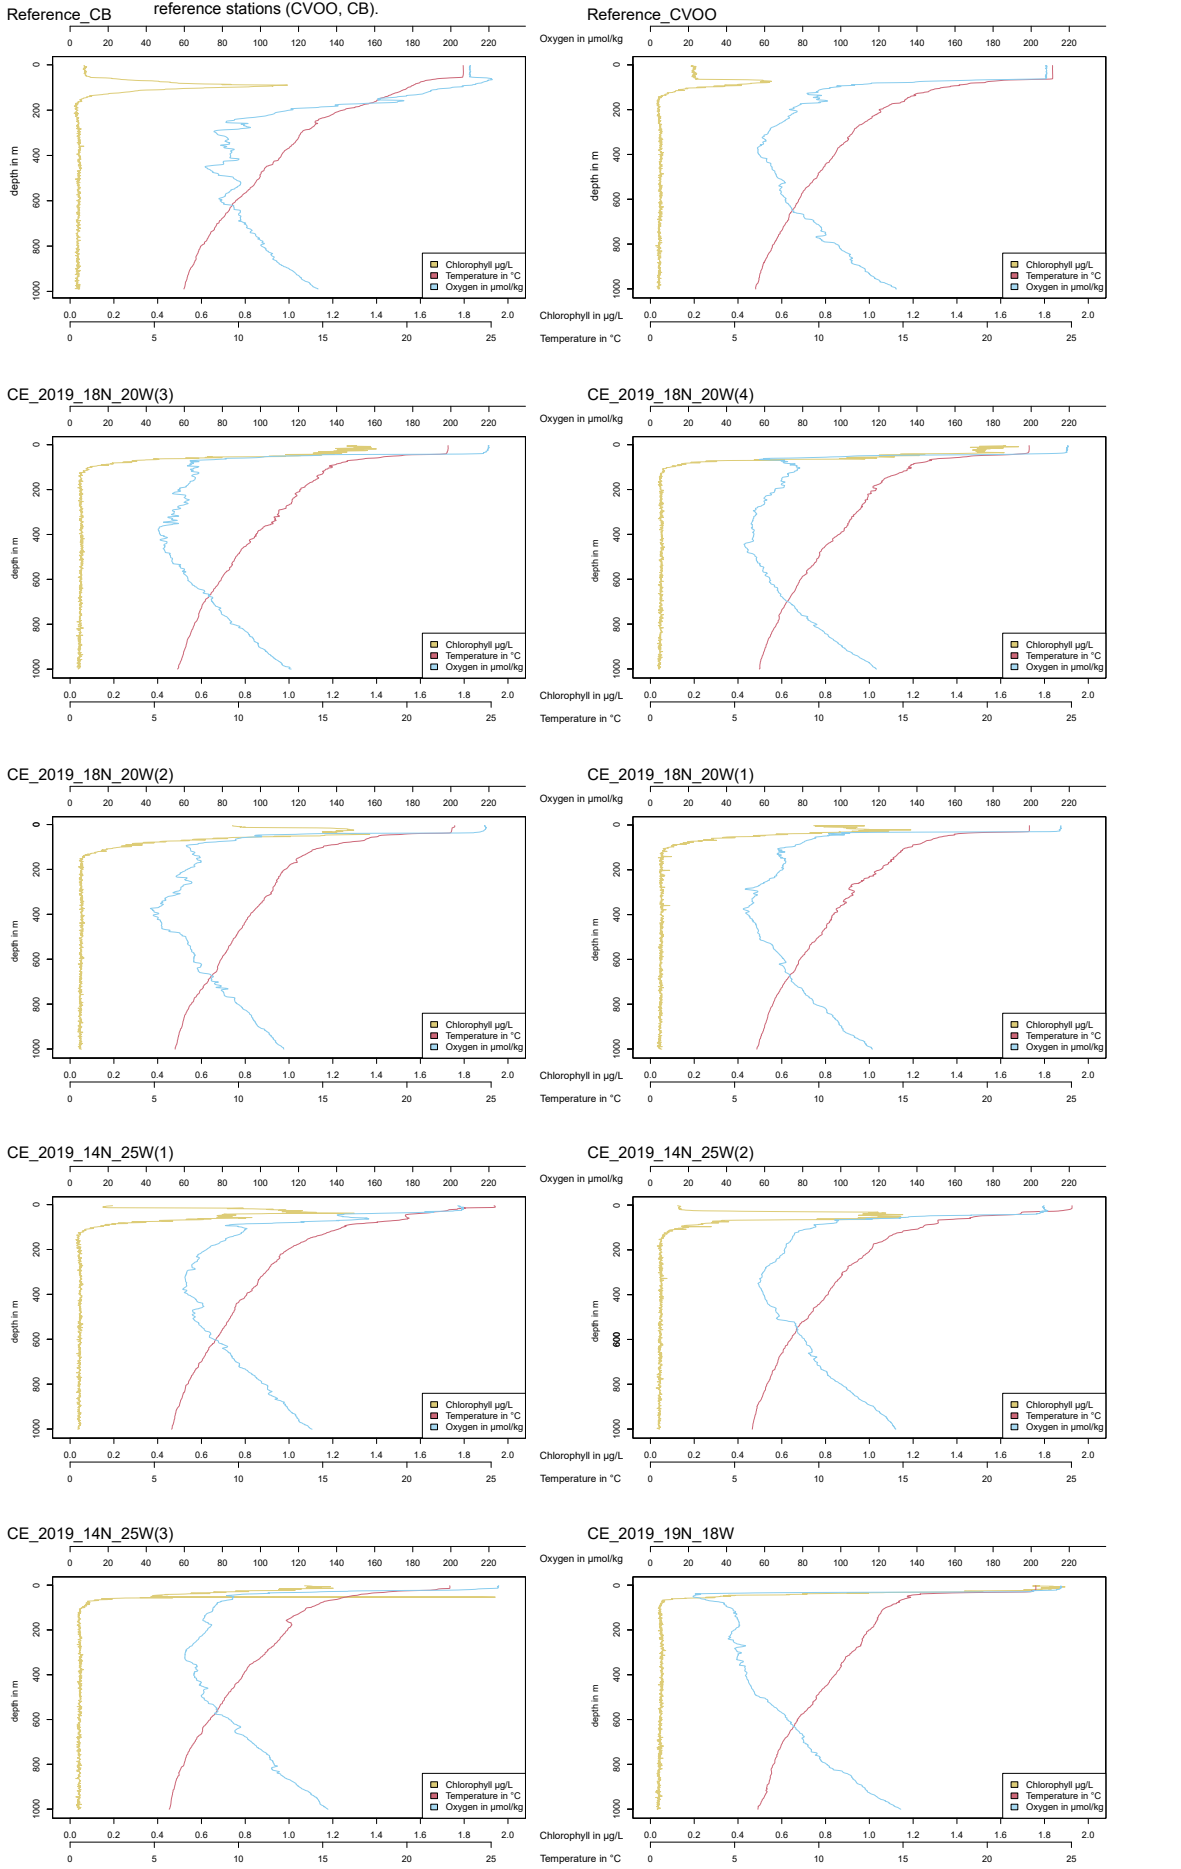

Supplement: Supplementary file 4 [file egusphere-2023-682-supplement.zip]
